# Supplementary material
Source: publisher site journal article supplement (https://www.dovepress.com/get_supplementary_file.php?f=496310.docx)

**Supplemental material S1 Medical Order Review Rules for Prophylactic Use of Proton Pump Inhibitors in the Perioperative Period**

**Key Points for Review**

(A) Principles of prophylactic use of proton pump inhibitors (PPIs) in the perioperative period

Proton pump inhibitors are used to prevent stress mucosal lesions. It is necessary to timely assess the disease status and strictly control the indications and duration of prophylactic use of PPIs. Patients at high risk for stress ulcers should be considered, and routine prophylactic use of proton pump inhibitors is not recommended. For those on prophylactic medication, there must be a description of the use of proton pump inhibitors in the medical record.

1. This review rule is not applicable for the review of therapeutic medications, including:

Therapeutic medication indications: Acid-related dyspepsia; Peptic ulcer; Gastroesophageal reflux disease (GERD); Zollinger-Ellison syndrome; Upper gastrointestinal bleeding; Reflux laryngopharyngitis

Others: ① Gastrointestinal bleeding occurring upon hospital admission; ② Acute pancreatitis, pancreatic surgery, intestinal obstruction, gastric fistula, intestinal fistula.

1. Indications for proton pump inhibitors use in perioperative patients

Patients with one of the following severe risk factors may be considered for prophylactic treatment:

(1) Mechanical ventilation or receiving extracorporeal life support (e.g., ECMO or hemopurification)

(2) Coagulation disorders [International Normalized Ratio (INR) >1.5, platelets <50×10^9/L or partial thromboplastin time >2 times the normal value] or taking anticoagulant or antiplatelet drugs

(3) Severe cranial, cervical, or spinal trauma

(4) Severe burns (adult burn area >30%, child burn area >15%)

(5) Severe trauma, multiple injuries

(6) Various difficult, complex surgeries (surgery time >3h)

(7) Acute renal failure or undergoing renal replacement therapy

(8) Chronic liver disease or acute liver failure

(9) Acute respiratory distress syndrome (ARDS)

(10) Shock or persistent low blood pressure

(11) Severe infection, sepsis

(12) Cardiovascular accidents

(13) Severe psychological stress, such as psychological trauma

Patients undergoing surgeries with the following two potential risk factors may be given PPIs for prophylactic treatment at the discretion:

(1) ICU stay >1 week

(2) Persistent fecal occult blood >3 days (excluding hemorrhoids)

(3) High-dose use of corticosteroids (dose > Hydrocortisone 250 mg/d or equivalent doses of other drugs)

(4) Routine use of NSAIDs before admission

(5) Existing history of peptic ulcer or bleeding

(6) Age over 60 years, history of Helicobacter pylori infection, and persistent *H. pylori* positivity

(7) Long-term fasting or parenteral nutrition

(8) Routine use of immunosuppressants before admission

1. Choice of Agents

According to the drug instructions, omeprazole and esomeprazole should be prioritized. Other PPIs are not recommended due to lack of clinical evidence and explicit indications in current instructions, except in the absence of alternative options or for special reasons (such as drug-drug interaction).

1. Dosage and Administration

PPIs should be administered once or twice daily, and the single dose should not exceed the following doses (Omeprazole 40mg, Lansoprazole 30mg, Esomeprazole 40mg, Pantoprazole 40mg).

Two types of PPIs should not be used simultaneously, and PPIs should not be administered both orally and intravenously at the same time.

If special circumstances require an increase in frequency and dose of administration, it should be specifically noted.

1. Route of Administration

Oral administration is recommended for patients who can take oral medications; intravenous administration may be considered for patients who cannot take oral medications (including nasogastric) or have gastrointestinal dysfunction.

**Proton Pump Inhibitor Order Review Registration Form for Perioperative Prophylactic Use**

Hospital Name: ____________________________________

Review Medical Record Number: ______________________

☐ Prophylactic Use ☐ Therapeutic Use (In this case, no further review is needed)

| Admission Information | Department | | |  | | | | | Hospitalization Number | | | | |  | | | |
| --- | --- | --- | --- | --- | --- | --- | --- | --- | --- | --- | --- | --- | --- | --- | --- | --- | --- |
| Admission Time | | |  | | | | | Discharge Time | | | | |  | | | |
| Patient Information | Name | | |  | | Gender ☐ Male ☐ Female | | | | | | | Age (years) | | |  | |
| Past Medical History | | ☐ None;  ☐ Yes: Disease: | | | | | Allergy History | | | | ☐ None;  ☐ Yes: Name: | | | | | |
| Discharge Diagnosis |  | | | | | | | | | | | | | | | | |
| Surgery Information | ☐ Emergency; ☐ Scheduled Surgery; ☐ Elective | | | | | | | | | | | | | | | | |
| Surgery Name | | | |  | | | | | | | | | | | | |
| Duration | | | | ☐<3h; ☐≥3h: From ______ To ______ | | | | | | | | | | | | |
| Blood Loss | | | | _____________ ml | | | | | | | | | | | | |
| Stress Ulcer High-Risk Factors and Indicators-- Severe Risk Factors  ☐ None ☐ 1 item; ☐ 2 items; ☐ 3 or more items | Having one of the following can consider prophylactic medication: ☐ Mechanical ventilation over 48h or receiving extracorporeal life support ☐ Coagulation disorders (INR >1.5, platelets <50×10^9/L or PTT >2 times the normal) or taking anticoagulant or antiplatelet drugs ☐ Severe cranial, cervical, or spinal trauma ☐ Severe burns (adult burn area >30%, child burn area >15%) ☐ Severe trauma, multiple injuries ☐ Various difficult, complex surgeries (surgery time >3h) ☐ Acute renal failure or undergoing renal replacement therapy ☐ Chronic liver disease or acute liver failure ☐ Acute respiratory distress syndrome (ARDS) ☐ Shock or persistent low blood pressure ☐ Severe infection, sepsis ☐ Cardiovascular accidents ☐ Severe psychological stress, such as psychological trauma ☐ Other severe risk factors:_________________________ | | | | | | | | | | | | | | | | |
| Stress Ulcer High-Risk Factors and Indicators-- Potential Risk Factors  ☐ None ☐ 1 item; ☐ 2 items; ☐ 3 or more items | Having two of following can consider prophylactic medication: ☐ ICU stay >1 week ☐ Persistent occult blood in stool >3 days (excluding hemorrhoids) ☐ High-dose corticosteroid use (dose > Hydrocortisone 250 mg/d or equivalent) ☐ Combined use of NSAIDs (especially long-term or high-dose use) ☐ Existing history of peptic ulcer or bleeding ☐ Age over 60 years, history of Helicobacter pylori infection, and persistent H. pylori positivity ☐ Long-term fasting or parenteral nutrition ☐ Long-term high-dose use of immunosuppressants ☐ Other potential risk factors:_________________________ | | | | | | | | | | | | | | | | |
| PPI Medication Use | Medication Name  (Generic and Trade Name) | | | Solvent | Route of Administration | | | | Single Dose | | Number of Doses | | | Start Time | End Time | | Days |
|  | | |  |  | | | |  | |  | | |  |  | |  |
|  | | |  |  | | | |  | |  | | |  |  | |  |
|  | | |  |  | | | |  | |  | | |  |  | |  |
| Dietary Situation | ☐ Regular Diet ☐ Semi-Liquid Diet ☐ Liquid Diet ☐ Fasting | | | | | | | | | | From _________ To ________ | | | | | | |
| ☐ Regular Diet ☐ Semi-Liquid Diet ☐ Liquid Diet ☐ Fasting | | | | | | | | | | From _________ To ________ | | | | | | |
| ☐ Regular Diet ☐ Semi-Liquid Diet ☐ Liquid Diet ☐ Fasting | | | | | | | | | | From _________ To ________ | | | | | | |
| ☐ Regular Diet ☐ Semi-Liquid Diet ☐ Liquid Diet ☐ Fasting | | | | | | | | | | From _________ To ________ | | | | | | |
| Medication Review | | | | | | | | | | | | | | | | | |
| Medication Indications | | | | ☐ Appropriate ☐ Not Appropriate:______________________ | | | | | | | | | | | | | |
| Choice of Medication | | | | ☐ Appropriate ☐ Not Appropriate:______________________ | | | | | | | | | | | | | |
| Dosage and Administration | | | | ☐ Appropriate ☐ Not Appropriate:______________________ | | | | | | | | | | | | | |
| Route of Administration | | | | ☐ Appropriate ☐ Not Appropriate:______________________ | | | | | | | | | | | | | |
| Other Inappropriate Medication Situations | | | | ☐ Appropriate ☐ Not Appropriate:______________________ | | | | | | | | | | | | | |
| Review Information | | | | | | | | | | | | | | | | | |
| Review Expert 1 |  | Review Expert 2 | | | | |  | | | Review Date | | | |  | | | |

**Supplemental material S2 Standard difference between the crude and propensity-score matched cohort**


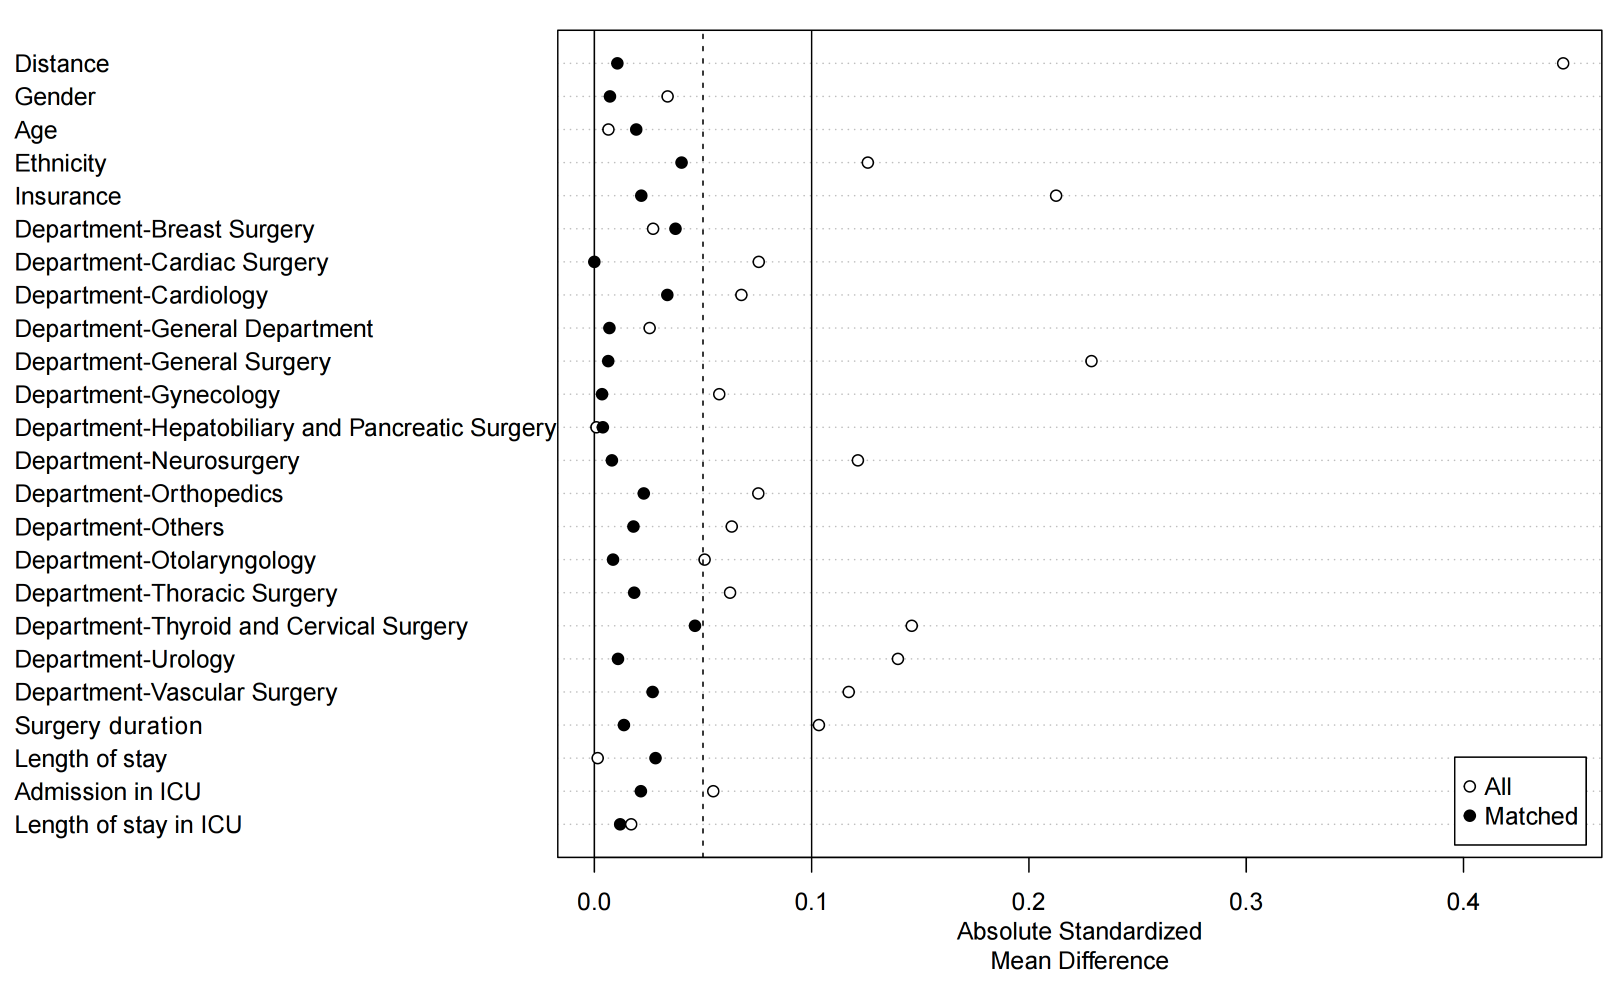

Supplement: Supplementary file 1 [file get_supplementary_file.php]
